# Supplementary material for: Enhanced photodynamic selectivity of nano-silica-attached porphyrins against breast cancer cells
Source: Royal Society of Chemistry journal article supplement (doi:10.1039/c2jm30897e), 2012-01-01
Supplement: c2jm30897e.pdf [file c2jm30897e.pdf]

## Electronic Supplementary Information

### Enhanced Photodynamic Selectivity of Nano-Silica-Attached Porphyrins Against Breast Cancer Cells

Wenbing Li, Wentong Lu, Zhen Fan, Xianchun Zhu, Aisha Reed, Brandon Newton, Yazhou Zhang, Shavelle Courtney, Papireddy T. Tiyyagura, Shufang Li, Ebonie Butler, Hongtao Yu, Paresh C. Ray and Ruomei Gao\*

Department of Chemistry and Biochemistry, Jackson State University, Jackson Mississippi 39217

#### Nanoparticle size measurements

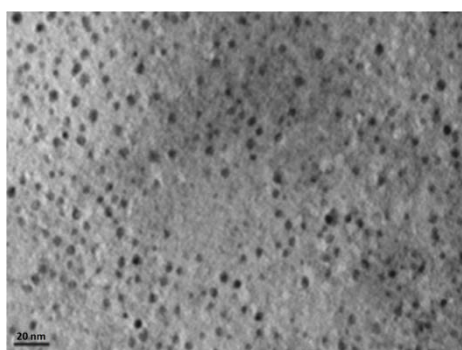

(a)

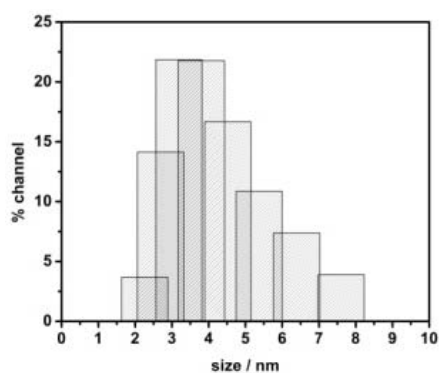

(b)

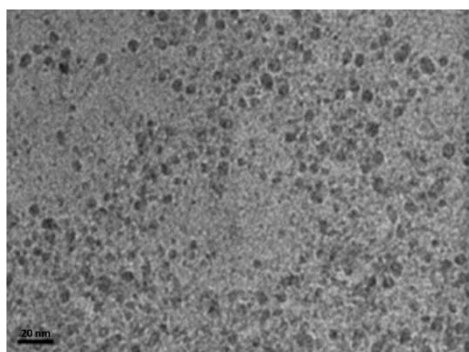

(c)

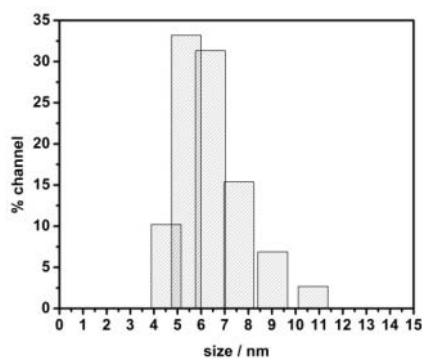

(d)

**Figure S1.** TEM images and nanoparticle size analysis for SiO<sub>2</sub> (a, b) and SiO<sub>2</sub>-TMPyP (c, d)

### Calculation of SiO<sub>2</sub> nanoparticle concentration

SiO<sub>2</sub> molarity is reported in terms of SiO<sub>2</sub> nanoparticles ( $C_{\text{SiO}_2}$ ) to better reflect experimental conditions. The nanoparticle concentration is calculated according to Eq. 1, using a SiO<sub>2</sub> density ( $d_{\text{SiO}_2}$ , g/cm<sup>3</sup>) of 2.6 g/cm<sup>3</sup> and an average diameter ( $\phi_{\text{SiO}_2}$ , nm) of 4.0 nm.

$$C_{\text{SiO}_2} = \frac{\frac{C_{\text{SiO}_2, \text{ g/L}}}{d_{\text{SiO}_2, \text{ g/cm}^3}}{\frac{4}{3}\pi\left(\frac{\phi_{\text{SiO}_2, \text{ nm}}}{2} \times 1 \times 10^{-7}\right)^3}}{6.02 \times 10^{23}} \quad (1)$$

### Adsorption of TMPyP onto SiO<sub>2</sub> nanoparticles.

The absorbance spectra and calibration curve for TMPyP loaded onto SiO<sub>2</sub> nanoparticles are shown in Figure S2. An average of 6.0 nm for SiO<sub>2</sub>-TMPyP was used for calculations in this paper. All of the experiments were carried out at ambient temperature. In a typical preparation, TMPyP ( $2.5 \times 10^{-5}$  M) was loaded onto SiO<sub>2</sub> (1.8 g/L or  $3.4 \times 10^{-5}$  M in terms of particle concentration). The molar ratio of TMPyP over SiO<sub>2</sub> is estimated to be  $2.5 \times 10^{-5} / 3.4 \times 10^{-5} = 0.74$ . We therefore conclude that under our experimental conditions, an average of one TMPyP molecule was loaded per SiO<sub>2</sub> particle.

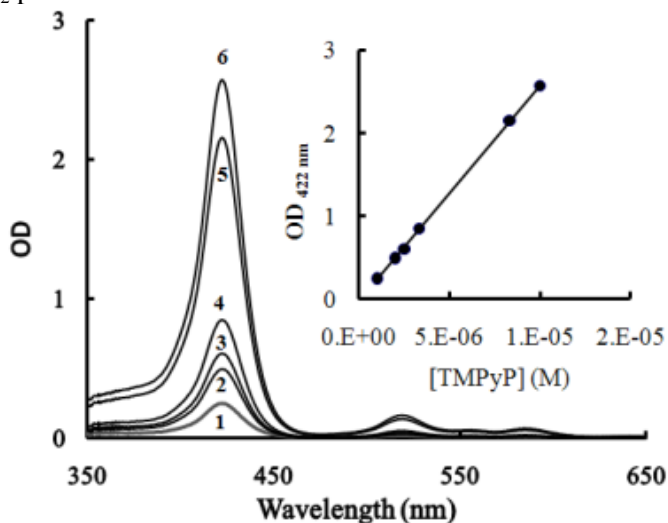

**Figure S2.** Absorption spectra and calibration curve of TMPyP adsorbed on SiO<sub>2</sub> nanoparticle (0.17 M) surface at pH 8. Spectra were measured against a pH 8 aqueous NaOH solution; 1-6:  $1.0 \times 10^{-6}$ ,  $2.0 \times 10^{-6}$ ,  $2.5 \times 10^{-6}$ ,  $3.3 \times 10^{-6}$ ,  $8.3 \times 10^{-6}$  and  $1.0 \times 10^{-5}$  M TMPyP, respectively. Insertion: calibration curve of absorbance at 426 nm vs.  $1.0 \times 10^{-6}$ - $1.0 \times 10^{-5}$  M TMPyP adsorbed on SiO<sub>2</sub> nanoparticles, giving an extinction coefficient of  $2.3 \times 10^5 \text{ M}^{-1} \text{ cm}^{-1}$

### Determination of bimolecular total quenching rate constants of <sup>1</sup>O<sub>2</sub> removal ( $k_T$ ) by Stern-Volmer analysis.

The  $k_T$  were determined by Stern-Volmer analysis for free TMPyP, SiO<sub>2</sub> and SiO<sub>2</sub>-TMPyP nanoparticles at pH 8 and pH 6. Measurements were carried out in D<sub>2</sub>O at an excitation wavelength of 532 nm using TSPP as a sensitizer. Our data indicated that the kinetics of <sup>1</sup>O<sub>2</sub> luminescence decay at 1270 nm followed Stern-Volmer equation of  $k = k_d + k_T[Q]$ , where  $k$  is the observed first-order rate constant of <sup>1</sup>O<sub>2</sub> decay after a laser pulse and  $k_d$  is the observed first-order solvent deactivation rate constant of <sup>1</sup>O<sub>2</sub> in the absence of a quencher. Changes in the <sup>1</sup>O<sub>2</sub> lifetime were observed with the addition of free TMPyP, SiO<sub>2</sub> and SiO<sub>2</sub>-TMPyP nanoparticles to solutions. Stern-Volmer plots show a good linear correlation between  $k$  and quencher concentrations  $[Q]$ .  $k_T$  values could then be derived from slopes of the straight lines.

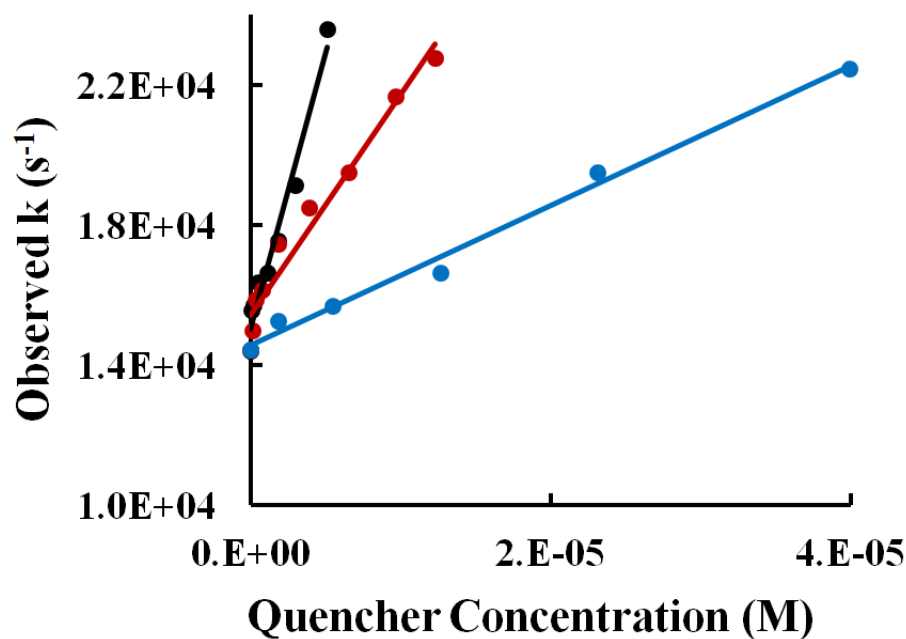

Figure S3. Stern-Volmer plots for the luminescence quenching of <sup>1</sup>O<sub>2</sub> by SiO<sub>2</sub> nanoparticles (black dots), SiO<sub>2</sub>-TMPyP (red dots) and free TMPyP (blue dots). Solid lines are theoretical simulation using linear least-square fitting method. The experiments were carried out at an excitation wavelength of 532 nm using *meso*-Tetra(4-sulfonatophenyl)porphine dihydrochloride (TSPP) as a sensitizer in pH 8 D<sub>2</sub>O solutions.

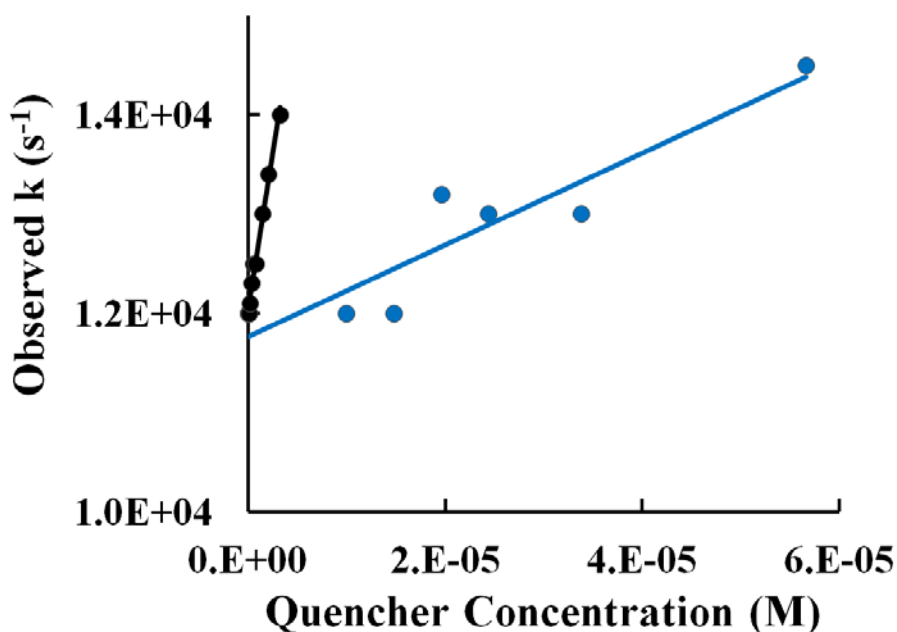

Figure S4. Stern-Volmer plots for the luminescence quenching of <sup>1</sup>O<sub>2</sub> by SiO<sub>2</sub> nanoparticles (black dots) and free TMPyP (blue dots). Solid lines are theoretical simulation using linear least-square fitting method. The experiments were carried out at an excitation wavelength of 532 nm using *meso*-Tetra(4-sulfonatophenyl)porphine dihydrochloride (TSPP) as a sensitizer in pH 6.0 D<sub>2</sub>O solutions.

**MTT assay results for Figure 6:**

|               | <b>Exp. Trial #</b> | <b>Sample 1</b><br>drak control<br>cells only | <b>Sample 2</b><br>dark control<br>cells+SiO2-TMPyP | <b>Sample 3</b><br>20 min irradiation<br>cells only | <b>Sample 4</b><br>20 min irradiation<br>cells+SiO2-TMPyP |
|---------------|---------------------|-----------------------------------------------|-----------------------------------------------------|-----------------------------------------------------|-----------------------------------------------------------|
| <b>pH 7.4</b> | 1.00                | 1.36                                          | 0.92                                                | 0.95                                                | 0.64                                                      |
|               | 2.00                | 0.71                                          | 0.70                                                | 0.86                                                | 0.48                                                      |
|               | 3.00                | 0.92                                          | 0.93                                                | 0.92                                                | 0.64                                                      |
|               | Average             | 1.00                                          | 0.85                                                | 0.91                                                | 0.59                                                      |
|               | S.D.                | 0.33                                          | 0.12                                                | 0.04                                                | 0.10                                                      |
| <b>pH 6.0</b> | 1.00                | 1.14                                          | 0.65                                                | 0.72                                                | 0.31                                                      |
|               | 2.00                | 0.89                                          | 0.91                                                | 0.73                                                | 0.42                                                      |
|               | 3.00                | 0.96                                          | 0.82                                                | 0.93                                                | 0.32                                                      |
|               | Average             | 1.00                                          | 0.79                                                | 0.79                                                | 0.35                                                      |
|               | S.D.                | 0.13                                          | 0.13                                                | 0.12                                                | 0.06                                                      |
